# Supplementary material for: Design and Characterisation of pH-Responsive Photosensitiser-Loaded Nano-Transfersomes for Enhanced Photodynamic Therapy
Source: MDPI journal article supplement (doi:10.3390/pharmaceutics14010210), 2022-01-16
Supplement: s1 [file s1]

# Supplementary Materials: Design and Characterisation of pH-Responsive Photosensitiser-Loaded Nano-Transfersomes for Enhanced Photodynamic Therapy

SooHo Yeo, Il Yoon and Woo Kyoung Lee

## Supplementary Information for In Vitro Photo-Irritation Studies

**Table S1.** Cell viability (%) of free MPa solution, F1, F2, F8, and F9 for dark cytotoxicity against HeLa cell. The concentration range of all compounds was 1.0 to 10.0  $\mu\text{M}$ . The percentage of cell viability was determined by WST assay. Error values represent the standard deviation of three replicate experiments.

| Concentration ( $\mu\text{M}$ ) | 1.0              | 2.5              | 5.0             | 10.0             |
|---------------------------------|------------------|------------------|-----------------|------------------|
| MPa                             | 116.1 $\pm$ 20.4 | 124.1 $\pm$ 21.6 | 106.8 $\pm$ 8.2 | 92.2 $\pm$ 6.0   |
| F1                              | 100.9 $\pm$ 5.3  | 95.9 $\pm$ 2.9   | 98.0 $\pm$ 7.1  | 92.3 $\pm$ 8.8   |
| F2                              | 106.9 $\pm$ 9.1  | 100.2 $\pm$ 2.1  | 83.4 $\pm$ 7.4  | 84.8 $\pm$ 13.5  |
| F8                              | 131.5 $\pm$ 5.0  | 128.7 $\pm$ 4.3  | 121.5 $\pm$ 1.3 | 84.9 $\pm$ 2.3   |
| F9                              | 143.0 $\pm$ 6.8  | 136.1 $\pm$ 11.5 | 130.0 $\pm$ 3.6 | 108.6 $\pm$ 12.9 |

**Table S2.** Cell viability (%) of free MPa solution, F1, F2, F8, and F9 for light cytotoxicity against HeLa cell. The concentration range of all compounds was 1.0 to 10.0  $\mu\text{M}$ . The percentage of cell viability was determined by WST assay. Error values represent the standard deviation of three replicate experiments.

| Concentration ( $\mu\text{M}$ ) | 1.0            | 2.5            | 5.0            | 10.0           |
|---------------------------------|----------------|----------------|----------------|----------------|
| MPa                             | 38.2 $\pm$ 2.1 | 37.0 $\pm$ 1.0 | 38.8 $\pm$ 2.3 | 35.7 $\pm$ 1.3 |
| F1                              | 49.9 $\pm$ 4.8 | 27.6 $\pm$ 0.7 | 35.5 $\pm$ 2.8 | 33.7 $\pm$ 0.9 |
| F2                              | 31.9 $\pm$ 1.1 | 25.6 $\pm$ 6.4 | 35.4 $\pm$ 0.9 | 35.4 $\pm$ 1.2 |
| F8                              | 75.2 $\pm$ 2.7 | 35.2 $\pm$ 0.0 | 35.4 $\pm$ 1.3 | 36.1 $\pm$ 3.3 |
| F9                              | 33.3 $\pm$ 1.1 | 33.1 $\pm$ 0.4 | 34.0 $\pm$ 2.2 | 32.4 $\pm$ 2.1 |

**Table S3.** Cell viability (%) of free MPa solution, F1, F2, F8, and F9 for dark cytotoxicity against A549 cell. The concentration range of all compounds was 1.0 to 10.0  $\mu\text{M}$ . The percentage of cell viability was determined by WST assay. Error values represent the standard deviation of three replicate experiments.

| Concentration ( $\mu\text{M}$ ) | 1.0              | 2.5              | 5.0            | 10.0            |
|---------------------------------|------------------|------------------|----------------|-----------------|
| MPa                             | 98.6 $\pm$ 4.2   | 110.5 $\pm$ 10.2 | 96.0 $\pm$ 4.4 | 97.9 $\pm$ 9.7  |
| F1                              | 95.7 $\pm$ 3.0   | 91.3 $\pm$ 12.3  | 88.9 $\pm$ 3.1 | 86.6 $\pm$ 3.7  |
| F2                              | 90.6 $\pm$ 6.8   | 90.7 $\pm$ 7.1   | 98.1 $\pm$ 3.8 | 97.5 $\pm$ 0.6  |
| F8                              | 99.0 $\pm$ 5.6   | 97.7 $\pm$ 7.5   | 94.8 $\pm$ 1.9 | 87.4 $\pm$ 10.3 |
| F9                              | 108.2 $\pm$ 12.1 | 98.0 $\pm$ 4.1   | 91.0 $\pm$ 2.0 | 83.6 $\pm$ 5.9  |

**Table S4.** Cell viability (%) of free MPa solution, F1, F2, F8, and F9 for light cytotoxicity against A549 cell. The concentration range of all compounds was 1.0 to 10.0  $\mu\text{M}$ . The percentage of cell viability was determined by WST assay. Error values represent the standard deviation of three replicate experiments.

| Concentration ( $\mu\text{M}$ ) | 1.0              | 2.5            | 5.0            | 10.0           |
|---------------------------------|------------------|----------------|----------------|----------------|
| MPa                             | 12.7 $\pm$ 1.0   | 15.2 $\pm$ 2.4 | 17.3 $\pm$ 1.3 | 15.6 $\pm$ 2.1 |
| F1                              | 23.3 $\pm$ 8.8   | 14.6 $\pm$ 1.8 | 15.0 $\pm$ 0.4 | 15.5 $\pm$ 0.2 |
| F2                              | 49.5 $\pm$ 5.2   | 23.9 $\pm$ 3.1 | 15.5 $\pm$ 1.8 | 15.5 $\pm$ 1.2 |
| F8                              | 106.5 $\pm$ 14.5 | 36.2 $\pm$ 5.9 | 19.0 $\pm$ 4.7 | 15.8 $\pm$ 0.7 |
| F9                              | 23.0 $\pm$ 6.0   | 18.2 $\pm$ 3.1 | 17.8 $\pm$ 2.1 | 21.6 $\pm$ 3.2 |
